# Supplementary material for: Swiss Frailty Network and Repository: protocol of a Swiss Personalized Health Network’s driver project observational study
Source: PubMed Central journal article supplement — BMJ Open. 2021 Jul 14;11(7):e047429. doi: 10.1136/bmjopen-2020-047429 (PMC8280893; doi:10.1136/bmjopen-2020-047429), 2021-07-14
Supplement: bmjopen-2020-047429.draft_revisions.pdf [file bmjopen-2020-047429.draft_revisions.pdf]

# BMJ Open

BMJ Open is committed to open peer review. As part of this commitment we make the peer review history of every article we publish publicly available.

When an article is published we post the peer reviewers' comments and the authors' responses online. We also post the versions of the paper that were used during peer review. These are the versions that the peer review comments apply to.

The versions of the paper that follow are the versions that were submitted during the peer review process. They are not the versions of record or the final published versions. They should not be cited or distributed as the published version of this manuscript.

BMJ Open is an open access journal and the full, final, typeset and author-corrected version of record of the manuscript is available on our site with no access controls, subscription charges or pay-per-view fees (<http://bmjopen.bmj.com>).

If you have any questions on BMJ Open's open peer review process please email [info.bmjopen@bmj.com](mailto:info.bmjopen@bmj.com)

# BMJ Open

## Swiss Frailty Network & Repository – Rationale and Design of a Swiss Personalized Health Network’s Driver Project Observational Study

|                               |                                                                                                                                                                                                                                                                                                                                                                                                                                                                                                                                                                                                                                                                                                                                                                                                                                                                                                                                                                                                                                                                                                                                                                                                                                                                                                                        |
|-------------------------------|------------------------------------------------------------------------------------------------------------------------------------------------------------------------------------------------------------------------------------------------------------------------------------------------------------------------------------------------------------------------------------------------------------------------------------------------------------------------------------------------------------------------------------------------------------------------------------------------------------------------------------------------------------------------------------------------------------------------------------------------------------------------------------------------------------------------------------------------------------------------------------------------------------------------------------------------------------------------------------------------------------------------------------------------------------------------------------------------------------------------------------------------------------------------------------------------------------------------------------------------------------------------------------------------------------------------|
| Journal:                      | <i>BMJ Open</i>                                                                                                                                                                                                                                                                                                                                                                                                                                                                                                                                                                                                                                                                                                                                                                                                                                                                                                                                                                                                                                                                                                                                                                                                                                                                                                        |
| Manuscript ID                 | bmjopen-2020-047429                                                                                                                                                                                                                                                                                                                                                                                                                                                                                                                                                                                                                                                                                                                                                                                                                                                                                                                                                                                                                                                                                                                                                                                                                                                                                                    |
| Article Type:                 | Protocol                                                                                                                                                                                                                                                                                                                                                                                                                                                                                                                                                                                                                                                                                                                                                                                                                                                                                                                                                                                                                                                                                                                                                                                                                                                                                                               |
| Date Submitted by the Author: | 28-Nov-2020                                                                                                                                                                                                                                                                                                                                                                                                                                                                                                                                                                                                                                                                                                                                                                                                                                                                                                                                                                                                                                                                                                                                                                                                                                                                                                            |
| Complete List of Authors:     | <p>Gagesch, Michael; University Hospital Zurich, Department of Geriatrics<br/>Edler, Karin; University Hospital Zurich, Clinical Trails Center<br/>Chocano-Bedoya, Patricia; University Hospital Zurich, Centre on Aging and Mobility; University of Bern, Institute of Primary Health Care (BIHAM)<br/>Abderhalden, Lauren; University Hospital Zurich, Centre on Aging and Mobility<br/>Seematter-Bagnoud, Laurence; Center for Primary Care and Public Health, Epidemiology and Health systems; University Hospital of Lausanne, Geriatric Medicine and Rehabilitation<br/>Meyer, Tobias; Universitäre Altersmedizin FELIX PLATTER<br/>Bertschi, Dominic; Spital Tiefenau<br/>Zekry, Dina; Geneva University Hospitals and University of Geneva, Department of Internal Medicine, Rehabilitation and Geriatrics, Division of Geriatrics<br/>Bula, Christophe; University of Lausanne Medical Center (CHUV), Service of Geriatric Medicine &amp; Geriatric Rehabilitation<br/>Gold, Gabriel; University Hospitals Geneva, Department of Rehabilitation and Geriatrics<br/>Kressig, Reto; Universitäre Altersmedizin FELIX PLATTER<br/>Stuck, Andreas; Inselspital Universitätsspital Bern, University Department of Geriatrics<br/>Bischoff-Ferrari, Heike; University Hospital Zurich, Department of Geriatrics</p> |
| Keywords:                     | GERIATRIC MEDICINE, EPIDEMIOLOGY, Health informatics < BIOTECHNOLOGY & BIOINFORMATICS                                                                                                                                                                                                                                                                                                                                                                                                                                                                                                                                                                                                                                                                                                                                                                                                                                                                                                                                                                                                                                                                                                                                                                                                                                  |
|                               |                                                                                                                                                                                                                                                                                                                                                                                                                                                                                                                                                                                                                                                                                                                                                                                                                                                                                                                                                                                                                                                                                                                                                                                                                                                                                                                        |

SCHOLARONE™  
Manuscripts

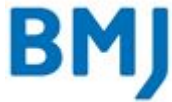

I, the Submitting Author has the right to grant and does grant on behalf of all authors of the Work (as defined in the below author licence), an exclusive licence and/or a non-exclusive licence for contributions from authors who are: i) UK Crown employees; ii) where BMJ has agreed a CC-BY licence shall apply, and/or iii) in accordance with the terms applicable for US Federal Government officers or employees acting as part of their official duties; on a worldwide, perpetual, irrevocable, royalty-free basis to BMJ Publishing Group Ltd ("BMJ") its licensees and where the relevant Journal is co-owned by BMJ to the co-owners of the Journal, to publish the Work in this journal and any other BMJ products and to exploit all rights, as set out in our [licence](#).

The Submitting Author accepts and understands that any supply made under these terms is made by BMJ to the Submitting Author unless you are acting as an employee on behalf of your employer or a postgraduate student of an affiliated institution which is paying any applicable article publishing charge ("APC") for Open Access articles. Where the Submitting Author wishes to make the Work available on an Open Access basis (and intends to pay the relevant APC), the terms of reuse of such Open Access shall be governed by a Creative Commons licence – details of these licences and which [Creative Commons](#) licence will apply to this Work are set out in our licence referred to above.

Other than as permitted in any relevant BMJ Author's Self Archiving Policies, I confirm this Work has not been accepted for publication elsewhere, is not being considered for publication elsewhere and does not duplicate material already published. I confirm all authors consent to publication of this Work and authorise the granting of this licence.

# Swiss Frailty Network & Repository – Rationale and Design of a Swiss Personalized Health Network’s Driver Project Observational Study

Michael Gagesch<sup>1,2</sup>, Karin Edler<sup>3</sup>, Patricia O. Chocano-Bedoya<sup>2,4</sup>, Lauren A. Abderhalden<sup>2</sup>, Laurence Seematter-Bagnoud<sup>5</sup>, Tobias Meyer<sup>6</sup>, Dominic Bertschi<sup>6,7</sup>, Dina Zekry<sup>8</sup>, Christophe J. Büla<sup>5</sup>, Gabriel Gold<sup>8</sup>, Reto W. Kressig<sup>6</sup>, Andreas E. Stuck<sup>7</sup>, and Heike A. Bischoff-Ferrari<sup>1,2,9</sup>

## Affiliations

<sup>1</sup> Department of Geriatrics, University Hospital Zurich, Zurich, Switzerland

<sup>2</sup> Centre on Aging and Mobility, University Hospital Zurich and University of Zurich, Zurich, Switzerland

<sup>3</sup> Research Data Service Center, University Hospital Zurich, Zurich, Switzerland

<sup>4</sup> Institute of Primary Health Care (BIHAM), University of Bern, Bern, Switzerland

<sup>5</sup> Service of Geriatric Medicine and Geriatric Rehabilitation, Lausanne University Hospital, Lausanne, Switzerland

<sup>6</sup> University Department of Geriatric Medicine FELIX PLATTER, Basel, Switzerland

<sup>7</sup> Department of Geriatrics, Inselspital, University Hospital Bern, and University of Bern, Bern, Switzerland

<sup>8</sup> Department of Rehabilitation and Geriatrics, University Hospitals Geneva, Geneva, Switzerland

<sup>9</sup> City Hospital Waid and Triemli, Zurich, Switzerland

## Corresponding Author

Michael Gagesch, MD

Dept. of Geriatrics

University Hospital Zurich

Zurich, Switzerland

Email: michael.gagesch@usz.ch

## Metrics

Title Characters: 133 (18 words), Abstract word count: 249

Manuscript word count: 2,271 (full text), 30 references, 2 tables

Key Words (6): Frailty, frail elderly, older adults, frailty assessment, frailty index, electronic health records

Running Head: Swiss Frailty Network and Repository – Rationale and Design

**Abstract**

*Introduction:* Early identification of frailty by clinical instruments or accumulation of deficit indexes can contribute to improve health care for older adults, including the prevention of negative outcomes in acute care. However, conflicting evidence exists on how to best capture frailty in this setting. Simultaneously, the increasing utilization of electronic health records (EHR) opens up new possibilities for research and patient care, including frailty.

*Methods and analysis:* The Swiss Frailty Network and Repository (SFNR) primarily aims to develop an electronic Frailty Index (eFI) from routinely available EHR data, validate it against a test-based clinical Frailty Instrument (cFI) and to investigate both tools' predictive ability against length of stay and in-hospital mortality, two important outcomes in acute care. As a Swiss Personalized Health Network (SPHN) driver project, we will connect all five Swiss University Hospitals' Geriatric Departments with a representative sample of patients aged 65 years and older admitted to acute care. Our study will report on the characteristics and usability of the first nationwide eFI in Switzerland, validated against a test-based cFI.

*Ethics and dissemination:* The study protocol was approved by the competent ethics committee of the Canton of Zurich (BASEC-ID 2019-00445). All acquired data will be handled according to SPHN's ethical framework for responsible data processing in personalized health research. Analyses will be performed within the secure BioMedIT environment, a national infrastructure to enable secure biomedical data processing, an integral part of SPHN. The SFNR is registered with ClinicalTrials.gov (NCT04516642), date of registration 18 August 2020 (retrospectively registered).

## Article Summary

### *Strengths and limitations of this study*

- This large multicenter study will establish a new harmonized electronic Frailty Index (eFI) from routinely collected electronic patient data at all five Swiss academic geriatric centers
- The new electronic Frailty Index (eFI) has the potential to predict two very important adverse outcomes in acute care, length of stay and in-hospital mortality
- Furthermore, these new data can be used to validate the electronic Frailty Index (eFI) against our new standardized clinical Frailty Instrument (cFI)
- Our study is not intended to establish long-term outcomes in participants identified as frail vs. their robust counterparts
- No report on potential interventions for participants identified as frail or at-risk of becoming frail is included in this study

## 1 Introduction

2 With the ongoing demographic transformation, aging societies convey an important challenge  
3 to present health care systems due to the growing number of older adults living with accumulating  
4 deficits, multimorbidity and frailty.<sup>1</sup> At the same time, health care informatics with its expanding amount  
5 of routinely collected, electronic patient data comprises a huge potential for the exploitation of data for  
6 research purposes and future developments in personalized medicine. In order to avoid age  
7 discrimination, this should also include the utilization of electronic patient data in the interest of older  
8 adults.

9 Over the last two decades, frailty was characterized as an age associated disproportionate  
10 decline in physiologic reserves leading to increased vulnerability to external stressors,<sup>2</sup> and shown to  
11 be an important predictor of negative health outcomes in older adults.<sup>3</sup> Nonetheless, frailty is still  
12 underdiagnosed in acute care although frail older adults have more frequent and longer hospital stays,  
13 are re-hospitalized more often and eventually die earlier than their non-frail counterparts.<sup>3,4</sup>

14 The British Geriatric Society issued a recommendation for routine frailty screening in geriatric  
15 outpatients in order to timely assess the risk of frailty on the health of older adults.<sup>5</sup> Moreover, frailty is  
16 becoming more and more recognized as a useful concept for risk stratification in various medical  
17 specialties, from oncology to heart surgery.<sup>6</sup> However, there is so far no agreement either on the ideal  
18 conceptualization of frailty or on a single best screening instrument.<sup>7,8</sup> This appears to be a major  
19 roadblock for the broader implementation of the frailty concept into patient care.<sup>9</sup> At the same time,  
20 assessing frailty systematically in clinical care might open up a window of opportunity for both  
21 improving patient care for older adults and accelerating research efforts for a better understanding of  
22 the underlying pathophysiology of the frailty syndrome.<sup>10</sup>

23 Today, among the highly cited frailty conceptualizations, the frailty phenotype by Fried et al.<sup>11</sup>  
24 and the deficit accumulation concept (i.e. frailty index) by Rockwood and Mitnitski et al.<sup>12</sup> stand out as  
25 the two most extensively investigated approaches of frailty.<sup>13</sup> Deriving a frailty index from electronic  
26 patient data that are routinely collected, has the potential to expedite the routine identification of frail  
27 patients in acute hospital care, as no additional resources are needed.<sup>14</sup>

28 The Swiss Frailty Network and Repository (SFNR) aims to establish a nationwide harmonized  
29 frailty index (electronic Frailty Index, eFI) consisting of 55 variables from routinely collected electronic  
30 data in patients age 65 and older collected at all five Swiss University Hospitals. A secondary  
31 validation aim investigates the performance of the eFI as a screening tool for the detection of frail

1  
2  
3 32 individuals identified by a harmonized clinical Frailty Instrument (cFI) based on the Fried phenotype  
4  
5 33 concept, in patients age 65 and older in acute care at all five Swiss University Hospitals' Geriatric  
6  
7 34 Centers. In order to take into account the importance of cognitive impairment with regard to frailty, we  
8  
9 35 have added a short cognitive test as an additional component to the cFI.<sup>15,16</sup> We will investigate the  
10  
11 36 predictive abilities of the eFI and the cFI regarding two important outcomes in acute hospital care,  
12  
13 37 length of stay and in-hospital mortality. The development of a frailty data repository will in addition  
14  
15 38 serve as a basic personalized health research infrastructure for future studies in older adults across all  
16  
17 39 partner institutions.

18  
19 40 The utilization of routinely collected, electronic patient data is a major focus area in health  
20  
21 41 care, and of growing interest in many acute care settings, including geriatric medicine. Frailty is highly  
22  
23 42 prevalent in older patients and appears as a major driver of multiple negative outcomes in this  
24  
25 43 population. Establishing a harmonized electronic Frailty Index (eFI) from routinely collected electronic  
26  
27 44 health care data is therefore a timely effort that will likely contribute to the improvement of care for  
28  
29 45 older adult patients by early identifying those at increased risk for adverse outcomes.

30  
31 46 The main deliverable of the SFNR will be to establish a nationwide electronic Frailty Index  
32  
33 47 (eFI) derived from routinely collected electronic patient data for older adults in Switzerland curated  
34  
35 48 within the SPHNs BioMedIT ecosystem. We aim to demonstrate the eFI's predictive ability for two  
36  
37 49 important adverse outcomes in acute care, length of stay and in-hospital mortality and validate the eFI  
38  
39 50 in the detection of frailty against our clinical Frailty-Instrument (cFI).

40  
41 51 Addressing the topic of systematically evaluating frailty using a standardized, test-based  
42  
43 52 clinical Frailty Instrument (cFI) in patients admitted to acute care at all five Swiss Academic Geriatric  
44  
45 53 Centers is another important outcome of our collaboration. Therefore, establishing the SFNR will likely  
46  
47 54 advance the field of geriatric medicine and research. Incorporating frailty as a criterion in acute care  
48  
49 55 will allow a systematic and personalized pre-therapeutic stratification of patients according to each  
50  
51 56 patient's profile. This individualized approach will enhance the definition of person-based potential  
52  
53 57 harms and benefits of interventions in various medical disciplines, ranging from emergency medicine  
54  
55 58 and orthogeriatric units to cardio-vascular surgery and comprehensive cancer care. We expect first  
56  
57 59 results to be ready for scientific publication by mid 2022.  
58  
59  
60



## 60 **Methods and analysis**

61 The SFRN is a joint effort by all five Swiss Academic Geriatric Departments (Universities of  
62 Basel, Bern, Geneva, Lausanne and Zurich and adjacent University Hospitals) that is funded by the  
63 Swiss Personalized Health Network (SPHN, Grant No. 2017DRI02), an initiative of the Swiss Federal  
64 Government, namely the State Secretariat for Education, Research and Innovation and the Federal  
65 Office of Public Health.<sup>17</sup>

66 The SFNR has five primary aims:

- 67 I. Reaching a consensus on a nationwide research reference standard to assess frailty  
68 clinically in geriatric patients at all five partner sites (definition of cFI, goal 1), see  
69 **Table 1**
- 70 II. Reaching a consensus on the candidate variables aggregating to a harmonized eFI  
71 from regularly collected electronic patient data extracted from the local clinical  
72 information systems (CIS) at all five sites (goal 2), **Table 2**
- 73 III. Setting up of a frailty data hub for the collection, organization and maintenance of  
74 coded data from all five centers including both, the cFI from patients in acute care  
75 seen by the geriatric teams at each site (related to goal 1) and the harmonized eFI  
76 (related to goal 2) from all patients age 65 and older at the partnering Swiss University  
77 Hospitals
- 78 IV. Validating the eFI as a screening tool against the cFI as a clinical criterion standard  
79 within the pooled data set from all five Geriatric Centers (validation study)
- 80 V. Investigating the predictive abilities and the correlation between the cFI and the eFI  
81 with regard to the prediction of length of stay (LOS) and in-hospital mortality in acute  
82 geriatric care (correlation study)

### 84 *Sample size calculation*

85 For the validation and correlation study, the estimated total sample size of 1,000 to 1,500  
86 patients within a 12-month planned period was based on the two primary endpoints, hospital LOS and  
87 in-hospital mortality. In a prior study, Hope et al. found a median (IQR) LOS in the hospital for non-frail  
88 and frail individuals to be 13 (IQR 8-23) days and 17 (IQR 10-30) days, respectively.<sup>18</sup> Assuming  
89 symmetry, this translates to a mean (SD) of 13 (SD=(23-8)/1.35=11.1) days for non-frail individuals  
90 and 17 (14.8) days for frail individuals.<sup>19</sup> Another study investigating older adult medical inpatients

1  
2  
3 91 found a range in LOS between 4.2 and 7.8 along a Frailty Index score based on a comprehensive  
4  
5 92 geriatric assessment.<sup>20</sup> In addition, a systematic review and meta-analysis of nine observational  
6  
7 93 studies investigating outcomes in general surgery reported a mean LOS of 9.6 days (95% CI: 6.2–  
8  
9 94 12.9) in frail, and 6.4 days (4.9–7.9) in non-frail patients.<sup>21</sup> Conservatively assuming 20% of older  
10  
11 95 adults in acute care are frail (expected range from literature 20-50%)<sup>22</sup> and assuming a difference in  
12  
13 96 hospital LOS of 4 days, a total of 418 persons (92 frail, 326 non-frail) would be needed to achieve 80%  
14  
15 97 power at the 0.05 alpha level. Using a more conservative estimate of detecting a difference in hospital  
16  
17 98 LOS of 2 days, 1,655 (364 frail, 1,291 non-frail) individuals would be needed to achieve 80% power at  
18  
19 99 the 0.05 alpha level. Vermeiren et al. conducted a meta-analysis of 24 prospective studies comprising  
20  
21 100 over 150,000 individuals and found frailty to increase the likelihood of mortality more than 2-fold (OR  
22  
23 101 2.34 [1.77-3.09]).<sup>3</sup> We assume 20% of individuals are frail, and leave room for a greater degree of  
24  
25 102 uncertainty (wider confidence interval, CI 1.42-3.91) since this is a single study as opposed to a large  
26  
27 103 meta-analysis comprising many individuals. For a mortality rate of 5% in non-frail individuals, a total of  
28  
29 104 1,077 persons (237 frail, 840 non-frail) would be required to detect an OR=2.34 at the 0.05 confidence  
30  
31 105 level.

32 106 In summary, we consider a sample size of approximately 200-300 patients enrolled at each of  
33  
34 107 the five partnering sites over the planned 12-month period sufficient to answer our research questions.  
35  
36 108 However, the number of recruited participants at each site might not be equally distributed and differ  
37  
38 109 largely due to the local environments and in-patient capacities. Of note, the primary analysis will be  
39  
40 110 performed on the total sample of 1000 to 1500 patients.

#### 41 111 *Data Collection*

42  
43 112 The data collection for the components of the cFI will take place within the first four days upon  
44  
45 113 admission to acute geriatric care at all partner sites by certified examiners following a standardized  
46  
47 114 protocol. For calculating the eFI, only variables available from within 4 days upon admission will be  
48  
49 115 retrieved from the EHR and included to the dataset.

#### 50 116 *Statistical Analysis*

51  
52 117 To evaluate the ability of the eFI screening tool to correctly classify each patient as frail, pre-  
53  
54 118 frail or non-frail, we will calculate the sensitivity, specificity, as well as positive and negative predictive  
55  
56 119 values of the eFI (pre-defined cut-offs and tertiles) using the cFI as our reference standard.<sup>23</sup> Each  
57  
58 120 potential threshold will be applied to the continuous total sum scores of the eFI to classify frail vs. non-  
59  
60 121 frail participants. The resulting true positive rate (sensitivity) and false positive rate (1 – specificity) will

1  
2  
3 122 be determined using the cFI as the reference standard. A receiver operating characteristic (ROC)  
4  
5 123 curve will be constructed of all possible thresholds of the eFI. Discriminative ability will be estimated  
6  
7 124 based on the area under the ROC curve and associated *C* statistics.

8  
9 125 Hospital LOS in frail and non-frail individuals (classified by eFI and cFI) will be summarized  
10  
11 126 using mean, median, standard deviation, interquartile range, minimum and maximum. Differences in  
12  
13 127 hospital LOS between frail and non-frail individuals will be tested using a two-sided independent *t* test,  
14  
15 128 or Mann-Whitney *U* test if the data is skewed, at the 0.05 level. In-hospital mortality rates will be  
16  
17 129 calculated for the overall sample as well as for frail and non-frail subgroups. Logistic regression will be  
18  
19 130 used to quantify the association of frail (vs. non-frail) on in-hospital mortality.

### 20 131 *Progress to Date*

21  
22 132 In the first year of the project, consensus was reached among the project partners regarding  
23  
24 133 the composition and scoring of the clinical frailty instrument (cFI). At the same time, the variables  
25  
26 134 summarized in the electronic Frailty Index (eFI) were defined and harmonized. In the second year, the  
27  
28 135 local requirements for the provision of the data to be collected were analyzed and the required IT  
29  
30 136 infrastructure for secure data processing and delivery was set up. At the same time, the project-related  
31  
32 137 data infrastructure within the BioMedIT network was defined and made available by SPHN. Enrolment  
33  
34 138 of first participants into the study began in June 2020.

### 35 139 *Patient and public involvement*

36  
37 140 Patients and the general public were not involved in the design, recruitment and  
38  
39 141 implementation of our study. Participants will be informed regarding the detailed results of our study  
40  
41 142 only upon request. However, the results will be disseminated to the public according to the SPHN's  
42  
43 143 dissemination policy and by published articles.  
44  
45  
46  
47  
48  
49  
50  
51  
52  
53  
54  
55  
56  
57  
58  
59  
60

## 144 **Ethics and dissemination**

145 For the validation study, we will use data from all patients 65 years and older recruited from  
146 acute geriatric care units who agreed to participate in the study by informed consent. For the  
147 association study, with regard to the eFI, we will use data from consecutive patients age 65 and older  
148 admitted to acute care on various departments of the partnering university hospitals from a determined  
149 starting date.

150 All ethics committees of the involved partner sites, chaired by the ethics committee of the  
151 Canton of Zurich have approved our study (swissethics BASEC-ID 2019-00445).

### 152 *Swiss Personalized Health Network IT Ecosystem*

153 Our project's hosting initiative, the SPHN, is currently developing a nationwide health care  
154 data ecosystem in Switzerland to work towards interoperability of data from local information systems,  
155 e.g. clinical data management systems in enabling an effective exchange of patient data (e.g. disease  
156 phenotypes) for research with the ultimate goal of advancing personalized medicine.<sup>24,25</sup> Our project  
157 will support and build on this effort as a driver project. In a first step, the agreed set of eFI variables  
158 was submitted to the SPHN Clinical Semantic Interoperability Working Group, which has integrated  
159 the variables in a Swiss wide core dataset and is defining for each variable in which format they shall  
160 be shared and which additional (meta-) data are needed for optimal interoperability. The data of the  
161 test-based clinical Frailty Instrument will be collected in a standardized and centralized electronic Case  
162 Report Form in REDCap (Vanderbilt University, Nashville, USA) or in the clinical information system  
163 (EHR).

164 Next, our collected data (eFI and cFI) will be locally pre-processed by the clinical data  
165 warehouse teams. In particular, patient IDs will be mapped and de-identified before sharing to respect  
166 data privacy regulations.<sup>24</sup> Additionally, a standardized format for data transfer defined by a Data  
167 Coordination Center (DCC) will be used in order to allow interoperability. We will utilize the novel  
168 Swiss BioMedIT-Node secure data infrastructure currently under development by the Swiss Institute of  
169 Bioinformatics (SIB) and managed by the Personalized Health Informatics (PHI) Group and  
170 coordinated by the DCC as part of SPHN.<sup>26</sup> The de-identified data will be encrypted with a secure,  
171 standard mechanism (GPG) and sent via secure transfer to BioMedIT.

172 On BioMedIT, the analysis of the data will take place using state of the art software and tools  
173 thereby ensuring highest security levels for access to data, processing and sharing. FAIR data

1  
2  
3  
4  
5  
6  
7  
8  
9  
10  
11  
12  
13  
14  
15  
16  
17  
18  
19  
20  
21  
22  
23  
24  
25  
26  
27  
28  
29  
30  
31  
32  
33  
34  
35  
36  
37  
38  
39  
40  
41  
42  
43  
44  
45  
46  
47  
48  
49  
50  
51  
52  
53  
54  
55  
56  
57  
58  
59  
60

174 principles (findability, accessibility, interoperability, reusability) will be respected and ensured  
175 throughout the project in accordance with SPHN strategy.

For peer review only

176 **References**

1. Newman AB. Comorbidity and Multimorbidity. In: Newman A, Cauley, J., ed. *The Epidemiology of Aging*. Dordrecht: Springer; 2012.
2. Clegg A, Young J, Iliffe S, Rikkert MO, Rockwood K. Frailty in elderly people. *Lancet*. 2013;381(9868):752-762.
3. Vermeiren S, Vella-Azzopardi R, Beckwee D, et al. Frailty and the Prediction of Negative Health Outcomes: A Meta-Analysis. *J Am Med Dir Assoc*. 2016;17(12):1163.e1161-1163.e1117.
4. Lin HS, Watts JN, Peel NM, Hubbard RE. Frailty and post-operative outcomes in older surgical patients: a systematic review. *BMC Geriatr*. 2016;16(1):157.
5. Turner G, Clegg A. Best practice guidelines for the management of frailty: a British Geriatrics Society, Age UK and Royal College of General Practitioners report. *Age and Ageing*. 2014;43(6):744-747.
6. Theou O, Squires E, Mallery K, et al. What do we know about frailty in the acute care setting? A scoping review. *BMC Geriatr*. 2018;18(1):139.
7. Morley JE, Vellas B, van Kan GA, et al. Frailty consensus: a call to action. *J Am Med Dir Assoc*. 2013;14(6):392-397.
8. Rodriguez-Manas L, Feart C, Mann G, et al. Searching for an operational definition of frailty: a Delphi method based consensus statement: the frailty operative definition-consensus conference project. *J Gerontol A Biol Sci Med Sci*. 2013;68(1):62-67.
9. Walston J, Bandeen-Roche K, Buta B, et al. Moving Frailty Toward Clinical Practice: NIA Intramural Frailty Science Symposium Summary. *J Am Geriatr Soc*. 2019.
10. Dent E, Martin FC, Bergman H, Woo J, Romero-Ortuno R, Walston JD. Management of frailty: opportunities, challenges, and future directions. *The Lancet*. 2019;394(10206):1376-1386.
11. Fried LP, Tangen CM, Walston J, et al. Frailty in older adults: evidence for a phenotype. *J Gerontol A Biol Sci Med Sci*. 2001;56(3):M146-156.
12. Mitnitski AB, Mogilner AJ, Rockwood K. Accumulation of deficits as a proxy measure of aging. *ScientificWorldJournal*. 2001;1:323-336.
13. Buta BJ, Walston JD, Godino JG, et al. Frailty assessment instruments: Systematic characterization of the uses and contexts of highly-cited instruments. *Ageing Res Rev*. 2016;26:53-61.
14. Clegg A, Bates C, Young J, et al. Development and validation of an electronic frailty index using routine primary care electronic health record data. *Age Ageing*. 2016;45(3):353-360.
15. Avila-Funes JA, Amieva H, Barberger-Gateau P, et al. Cognitive impairment improves the predictive validity of the phenotype of frailty for adverse health outcomes: the three-city study. *J Am Geriatr Soc*. 2009;57(3):453-461.
16. Boyle PA, Buchman AS, Wilson RS, Leurgans SE, Bennett DA. Physical frailty is associated with incident mild cognitive impairment in community-based older persons. *J Am Geriatr Soc*. 2010;58(2):248-255.
17. Bischoff Ferrari HA, Stuck AE, Kressig RW, Gold G, Bula C. Swiss Frailty Network and Repository -SFNR. In: Switzerland: Swiss Personalized Health Network; 2017.
18. Hope AA, Adeoye O, Chuang EH, Hsieh SJ, Gershengorn HB, Gong MN. Pre-hospital frailty and hospital outcomes in adults with acute respiratory failure requiring mechanical ventilation. *J Crit Care*. 2018;44:212-216.
19. Wan X, Wang W, Liu J, Tong T. Estimating the sample mean and standard deviation from the sample size, median, range and/or interquartile range. *BMC Med Res Methodol*. 2014;14:135.
20. Evans SJ, Sayers M, Mitnitski A, Rockwood K. The risk of adverse outcomes in hospitalized older patients in relation to a frailty index based on a comprehensive geriatric assessment. *Age Ageing*. 2014;43(1):127-132.
21. Hewitt J, Long S, Carter B, Bach S, McCarthy K, Clegg A. The prevalence of frailty and its association with clinical outcomes in general surgery: a systematic review and meta-analysis. *Age Ageing*. 2018;47(6):793-800.
22. Hogan DB, Maxwell CJ, Afilalo J, et al. A Scoping Review of Frailty and Acute Care in Middle-Aged and Older Individuals with Recommendations for Future Research. *Can Geriatr J*. 2017;20(1):22-37.
23. Rockwood K, Andrew M, Mitnitski A. A comparison of two approaches to measuring frailty in elderly people. *J Gerontol A Biol Sci Med Sci*. 2007;62(7):738-743.
24. Swiss Personalized Health Network. *Swiss Personalized Health Network (SPHN)*. 2017; <https://www.sphn.ch/en/about.html>. Accessed 25.07.2019, 2019.
25. Meier-Abt PJ, Lawrence AK, Selter L, Vayena E, Schwede T. The Swiss approach to precision medicine. *Swiss Med Wkly*. 2018.

- 1  
2  
3 237 26. Swiss Institute of Bioinformatics. Personalized Health Informatics Group. 2018;  
4 238 [https://www.sib.swiss/research-infrastructure/personalized-health-2/personalized-health-  
6 240 informatics-group](https://www.sib.swiss/research-infrastructure/personalized-health-2/personalized-health-<br/>5 239 informatics-group). Accessed 25.07.2019, 2019.  
7 241 27. D'Ath P, Katona P, Mullan E, Evans S, Katona C. Screening, detection and management of  
8 242 depression in elderly primary care attenders. I: The acceptability and performance of the 15  
9 243 item Geriatric Depression Scale (GDS15) and the development of short versions. *Fam Pract*.  
10 244 1994;11(3):260-266.  
11 245 28. Shah A, Herbert R, Lewis S, Mahendran R, Platt J, Bhattacharyya B. Screening for depression  
12 246 among acutely ill geriatric inpatients with a short Geriatric Depression Scale. *Age Ageing*.  
13 247 1997;26(3):217-221.  
14 248 29. Gagesch M, Abderhalden L, Kressig RW, et al. Threshold definition for grip strength to identify  
15 249 relevant weakness in Swiss DO-HEALTH participants. International Conference on Frailty and  
16 250 Sarcopenia Research; 2019; Miami Beach, FL, USA.  
17 251 30. Börsch-Supan A., Brügiavini A. *Health, Ageing and Retirement in Europe - First Results from  
18 252 the Survey of Health, Ageing and Retirement in Europe*. Mannheim Research Institute for the  
19  
20  
21  
22  
23  
24  
25  
26  
27  
28  
29  
30  
31  
32  
33  
34  
35  
36  
37  
38  
39  
40  
41  
42  
43  
44  
45  
46  
47  
48  
49  
50  
51  
52  
53  
54  
55  
56  
57  
58  
59  
60

253 **Tables and Figures****Table 1.** Components of the SFNR clinical Frailty Instrument (cFI)

| Domain (item)           | Operationalization (test-based)                                                                                                                           | Cut-Point (threshold)                                                                                                                                     |
|-------------------------|-----------------------------------------------------------------------------------------------------------------------------------------------------------|-----------------------------------------------------------------------------------------------------------------------------------------------------------|
| Shrinking (Weight Loss) | <b>Unintentional weight loss</b> or loss of appetite; report of lose clothing, weight loss documented in patient chart                                    | Any reported weight loss or loss of appetite or lose clothing, or >5% last 6 months (from EHR)                                                            |
| Fatigue                 | <b>Self-reported exhaustion</b> measured by Geriatric Depression Scale 4-item                                                                             | ≥2 Points on GDS-4 <sup>27,28</sup>                                                                                                                       |
| Slowness                | <b>Slow gait speed</b> on standardized 4m measurement from a standing start (best of 2 consecutive measurements)                                          | Gait speed below 0.8m/s                                                                                                                                   |
| Weakness                | <b>Low hand grip strength</b> measured by the Martin Vigorimeter (in Kilopascal), best of 3 consecutive trials at the dominant hand at time of assessment | Below the median of lowest 20% (by gender and age <75 and ≥75 years of age) compared to population based reference sample (from DO-HEALTH <sup>29</sup> ) |
| Low Activity Level      | <b>Reported frequency of activities with moderate energy expenditure</b> (question BR016_ModSprtsAct from SHARE questionnaire <sup>30</sup> )             | Answer of "less than once a week"                                                                                                                         |
| Cognition               | <b>Three item recall, and clock drawing test (CDT)</b>                                                                                                    | Any error in recall or CDT indicates cognitive disturbance                                                                                                |

254



**Table 2.** Variables and Coding of the SFNR electronic Frailty Index (eFI)

| <b>System</b>                 | <b>Source</b>                                                   | <b>Variables (No.)</b>                                                                                                                                                                                                                                                                                                                                                                                                                                                                                         | <b>Cut-point/Coding</b>                                                                                                                |
|-------------------------------|-----------------------------------------------------------------|----------------------------------------------------------------------------------------------------------------------------------------------------------------------------------------------------------------------------------------------------------------------------------------------------------------------------------------------------------------------------------------------------------------------------------------------------------------------------------------------------------------|----------------------------------------------------------------------------------------------------------------------------------------|
| <i>Functional Impairments</i> | Electronic Health Records:<br>Electronic Nursing Charts (NANDA) | 1. Chronic constipation<br>2. Feeling tired<br>3. Problems with falling/staying asleep<br>4. Problems with sleep-awake cycle<br>5. Urinary incontinence<br>6. Help getting on/off bed<br>7. Help going to the toilet<br>8. Help walking<br>9. History of falls<br>10. Inability to walk stairs<br>11. Irregular gait pattern<br>12. Patient using walking equipment/aid<br>13. Problems getting dressed<br>14. Problems with bathing<br>15. Clouding or delirium                                               | yes=1, no=0                                                                                                                            |
|                               |                                                                 | 16. Food intake                                                                                                                                                                                                                                                                                                                                                                                                                                                                                                | impaired=1, normal=0                                                                                                                   |
| <i>Comorbidities</i>          | Electronic Health Records:<br>Diagnosis List<br>Medication Use  | 17. Active malignancy<br>18. Hearing impairment<br>19. History of osteoporosis<br>20. Cardiac arrhythmias<br>21. Coronary heart disease<br>22. Pressure sores (decubital ulcers)<br>23. Diabetes mellitus<br>24. History of seizures<br>25. History of stroke<br>26. Memory impairment<br>27. Chronic obstructive lung disease (COPD)<br>28. Use of anticoagulation medication<br>29. Use of antiplatelet medication<br>30. Polypharmacy (>5 drugs)<br>31. Use of sedative, hypnotic, and/or neuroleptic drugs | Presence (yes)=1, absence (no)=0                                                                                                       |
|                               |                                                                 | 32. Haematocrit                                                                                                                                                                                                                                                                                                                                                                                                                                                                                                | <35%=1, ≥35%=0                                                                                                                         |
| <i>Laboratory Results</i>     | Primary Laboratory System                                       | 33. Haemoglobin<br>34. Platelet Count<br>35. Red cell volume (MCV)<br>36. Creatinine<br>37. Urea<br>38. Thyrotropin (TSH)<br>39. C-reactive protein (CRP)<br>40. Lymphocyte total count<br>41. HDL (High-density lipoprotein)<br>42. Potassium<br>43. Sodium<br>44. Albumin                                                                                                                                                                                                                                    | Serum concentration above or below reference range=1, within=0                                                                         |
|                               |                                                                 | 45. Blood glucose<br>46. Cholesterol                                                                                                                                                                                                                                                                                                                                                                                                                                                                           | <3.9 or >15 mmol/l=1, other=0<br>>7 or <3.5 mmol/L=1, other=0                                                                          |
| <i>Vital Signs</i>            | Electronic Health Records                                       | 47. Body Temperature<br>48. Diastolic blood pressure<br>49. Heart rate (pulse)<br>50. Systolic blood pressure<br>51. Oxygen saturation (spO2)<br>52. Patient requires supplemental oxygen                                                                                                                                                                                                                                                                                                                      | <36,3°C=1, ≥36,3°C=0<br>>90mmHg=1, ≤90 mmHg=0<br><60 or >99 BPM=1, other=0<br>>140mmHg=1, ≤140 mmHg=0<br><90%=1, ≥90%=0<br>yes=1, no=0 |
| <i>Other</i>                  | Electronic Health Records                                       | 53. Age<br>54. BMI (Body Mass Index)<br>55. Patient reports being in pain                                                                                                                                                                                                                                                                                                                                                                                                                                      | >80=1, ≤80=0<br><18.5 or ≥30=1; >25 and <30=0.5, other=0<br>yes=1, no=0                                                                |

1  
2  
3 **256 List of Abbreviations**

4  
5 257 AUC - Area under the curve  
6  
7 258 BASEC - Business Administration System for Ethics Committees  
8  
9 259 cFI - clinical Frailty Instrument  
10  
11 260 CI - Confidence Interval  
12  
13 261 eFI - electronic Frailty Index  
14  
15 262 DCC - Data Coordination Center  
16  
17 263 EHR - Electronic Health Records  
18  
19 264 GPG - Gnu Privacy Guard  
20  
21 265 ID - Identifier  
22  
23 266 IQR - Inter quartile range  
24  
25 267 LOS - Length of stay  
26  
27 268 OR - Odds ratio  
28  
29 269 PHI - Personalized Health Informatics  
30  
31 270 ROC - Receiver Operating Characteristics  
32  
33 271 SFNR - Swiss Frailty Network & Repository  
34  
35 272 SIB - Swiss Institute of Bioinformatics  
36  
37 273 SPHN - Swiss Personalized Health Network  
38  
39  
40  
41  
42  
43  
44  
45  
46  
47  
48  
49  
50  
51  
52  
53  
54  
55  
56  
57  
58  
59  
60

1  
2  
3 274 **Declarations**

4  
5 275 • *Ethics approval and consent to participate*

6  
7 276 The competent ethic committees of the involved partner sites, chaired by the Ethics  
8  
9 277 Committee of the Canton of Zurich, Switzerland have approved our study (swissethics  
10  
11 278 BASEC-ID 2019-00445, DOA September 23, 2019). Participants are enrolled to the study  
12  
13 279 after written informed consent.

14 280

15  
16 281 • *Competing interests*

17  
18 282 The authors declare that they have no competing interests.

19  
20 283

21  
22 284 • Funding

23  
24 285 This project has been funded as a driver project by the Swiss Personalized Health Network  
25  
26 286 (grant number 2017DRI02) with the participating University Hospitals in-kind contributions of  
27  
28 287 the same amount (matching funds, grant number N/A). The funding source was not involved in  
29  
30 288 study design, and will not be involved in the collection, analysis or interpretation of data.

31  
32 289

33  
34 290 • Authors' contributions

35  
36 291 MG and KE prepared the first draft of the manuscript. POCB and LAA provided the power  
37  
38 292 analysis and wrote the section on statistical analysis. LSB, TM, DB, DZ, CJB, GG, RWK, AES  
39  
40 293 have read and edited the paper for intellectual content and contributed significantly to the  
41  
42 294 manuscript. HABF was a major contributor in writing the final manuscript. MG prepared the  
43  
44 295 final editing before submission. All authors read and approved the final manuscript.

45 296

46  
47 297 • Acknowledgements

48  
49 298 Not applicable.

50

51

52

53

54

55

56

57

58

59

60

# BMJ Open

## Swiss Frailty Network & Repository – Protocol of a Swiss Personalized Health Network’s Driver Project Observational Study

|                                 |                                                                                                                                                                                                                                                                                                                                                                                                                                                                                                                                                                                                                                                                                                                                                                                                                                                                                                                                                                                                                                                                                                                                                                                                                                                                                                                                                                                                                                                                                                                                                                                                                                       |
|---------------------------------|---------------------------------------------------------------------------------------------------------------------------------------------------------------------------------------------------------------------------------------------------------------------------------------------------------------------------------------------------------------------------------------------------------------------------------------------------------------------------------------------------------------------------------------------------------------------------------------------------------------------------------------------------------------------------------------------------------------------------------------------------------------------------------------------------------------------------------------------------------------------------------------------------------------------------------------------------------------------------------------------------------------------------------------------------------------------------------------------------------------------------------------------------------------------------------------------------------------------------------------------------------------------------------------------------------------------------------------------------------------------------------------------------------------------------------------------------------------------------------------------------------------------------------------------------------------------------------------------------------------------------------------|
| Journal:                        | <i>BMJ Open</i>                                                                                                                                                                                                                                                                                                                                                                                                                                                                                                                                                                                                                                                                                                                                                                                                                                                                                                                                                                                                                                                                                                                                                                                                                                                                                                                                                                                                                                                                                                                                                                                                                       |
| Manuscript ID                   | bmjopen-2020-047429.R1                                                                                                                                                                                                                                                                                                                                                                                                                                                                                                                                                                                                                                                                                                                                                                                                                                                                                                                                                                                                                                                                                                                                                                                                                                                                                                                                                                                                                                                                                                                                                                                                                |
| Article Type:                   | Protocol                                                                                                                                                                                                                                                                                                                                                                                                                                                                                                                                                                                                                                                                                                                                                                                                                                                                                                                                                                                                                                                                                                                                                                                                                                                                                                                                                                                                                                                                                                                                                                                                                              |
| Date Submitted by the Author:   | 19-May-2021                                                                                                                                                                                                                                                                                                                                                                                                                                                                                                                                                                                                                                                                                                                                                                                                                                                                                                                                                                                                                                                                                                                                                                                                                                                                                                                                                                                                                                                                                                                                                                                                                           |
| Complete List of Authors:       | Gagesch, Michael; University Hospital Zurich, Department of Geriatrics; University Hospital Zurich and University of Zurich, Centre on Aging and Mobility<br>Edler, Karin; University Hospital Zurich, Research Data Service Center, Clinical Trails Center<br>Chocano-Bedoya, Patricia; University Hospital Zurich and University of Zurich, Centre on Aging and Mobility; University of Bern, Institute of Primary Health Care (BIHAM)<br>Abderhalden, Lauren; University Hospital Zurich and University of Zurich, Centre on Aging and Mobility<br>Seematter-Bagnoud, Laurence; Center for Primary Care and Public Health, Epidemiology and Health Systems; University Hospital of Lausanne, Service of Geriatric Medicine and Geriatric Rehabilitation<br>Meyer, Tobias; Universitäre Altersmedizin FELIX PLATTER<br>Bertschi, Dominic; Universitäre Altersmedizin FELIX PLATTER; Spital Tiefenau, Geriatrische Universitätsklinik, Akutgeriatrie<br>Zekry, Dina; Geneva University Hospitals, Department of Internal Medicine, Rehabilitation and Geriatrics, Division of Geriatrics<br>Bula, Christophe; Lausanne University Hospital, Service of Geriatric Medicine and Geriatric Rehabilitation<br>Gold, Gabriel; University Hospitals Geneva, Department of Rehabilitation and Geriatrics<br>Kressig, Reto; Universitäre Altersmedizin FELIX PLATTER; Universität Basel<br>Stuck, Andreas; Inselspital Universitätsspital Bern, Department of Geriatrics<br>Bischoff-Ferrari, Heike; University Hospital Zurich, Department of Geriatrics; University Hospital Zurich and University of Zurich, Centre on Aging and Mobility |
| <b>Primary Subject Heading</b>: | Geriatric medicine                                                                                                                                                                                                                                                                                                                                                                                                                                                                                                                                                                                                                                                                                                                                                                                                                                                                                                                                                                                                                                                                                                                                                                                                                                                                                                                                                                                                                                                                                                                                                                                                                    |
| Secondary Subject Heading:      | Epidemiology, Health informatics                                                                                                                                                                                                                                                                                                                                                                                                                                                                                                                                                                                                                                                                                                                                                                                                                                                                                                                                                                                                                                                                                                                                                                                                                                                                                                                                                                                                                                                                                                                                                                                                      |
| Keywords:                       | GERIATRIC MEDICINE, EPIDEMIOLOGY, Health informatics < BIOTECHNOLOGY & BIOINFORMATICS                                                                                                                                                                                                                                                                                                                                                                                                                                                                                                                                                                                                                                                                                                                                                                                                                                                                                                                                                                                                                                                                                                                                                                                                                                                                                                                                                                                                                                                                                                                                                 |
|                                 |                                                                                                                                                                                                                                                                                                                                                                                                                                                                                                                                                                                                                                                                                                                                                                                                                                                                                                                                                                                                                                                                                                                                                                                                                                                                                                                                                                                                                                                                                                                                                                                                                                       |

1  
2  
3  
4  
5  
6  
7  
8  
9  
10  
11  
12  
13  
14  
15  
16  
17  
18  
19  
20  
21  
22  
23  
24  
25  
26  
27  
28  
29  
30  
31  
32  
33  
34  
35  
36  
37  
38  
39  
40  
41  
42  
43  
44  
45  
46  
47  
48  
49  
50  
51  
52  
53  
54  
55  
56  
57  
58  
59  
60

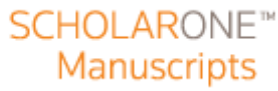

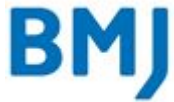

I, the Submitting Author has the right to grant and does grant on behalf of all authors of the Work (as defined in the below author licence), an exclusive licence and/or a non-exclusive licence for contributions from authors who are: i) UK Crown employees; ii) where BMJ has agreed a CC-BY licence shall apply, and/or iii) in accordance with the terms applicable for US Federal Government officers or employees acting as part of their official duties; on a worldwide, perpetual, irrevocable, royalty-free basis to BMJ Publishing Group Ltd ("BMJ") its licensees and where the relevant Journal is co-owned by BMJ to the co-owners of the Journal, to publish the Work in this journal and any other BMJ products and to exploit all rights, as set out in our [licence](#).

The Submitting Author accepts and understands that any supply made under these terms is made by BMJ to the Submitting Author unless you are acting as an employee on behalf of your employer or a postgraduate student of an affiliated institution which is paying any applicable article publishing charge ("APC") for Open Access articles. Where the Submitting Author wishes to make the Work available on an Open Access basis (and intends to pay the relevant APC), the terms of reuse of such Open Access shall be governed by a Creative Commons licence – details of these licences and which [Creative Commons](#) licence will apply to this Work are set out in our licence referred to above.

Other than as permitted in any relevant BMJ Author's Self Archiving Policies, I confirm this Work has not been accepted for publication elsewhere, is not being considered for publication elsewhere and does not duplicate material already published. I confirm all authors consent to publication of this Work and authorise the granting of this licence.

## Swiss Frailty Network & Repository – Protocol of a Swiss Personalized Health Network’s Driver Project Observational Study

Michael Gagesch<sup>1,2</sup>, Karin Edler<sup>3</sup>, Patricia O. Chocano-Bedoya<sup>2,4</sup>, Lauren A. Abderhalden<sup>2</sup>, Laurence Seematter-Bagnoud<sup>5</sup>, Tobias Meyer<sup>6</sup>, Dominic Bertschi<sup>6,7</sup>, Dina Zekry<sup>8</sup>, Christophe J. Büla<sup>5</sup>, Gabriel Gold<sup>8</sup>, Reto W. Kressig<sup>6</sup>, Andreas E. Stuck<sup>7</sup>, and Heike A. Bischoff-Ferrari<sup>1,2,9</sup>

### Affiliations

<sup>1</sup> Department of Geriatrics, University Hospital Zurich, Zurich, Switzerland

<sup>2</sup> Centre on Aging and Mobility, University Hospital Zurich and University of Zurich, Zurich, Switzerland

<sup>3</sup> Research Data Service Center, University Hospital Zurich, Zurich, Switzerland

<sup>4</sup> Institute of Primary Health Care (BIHAM), University of Bern, Bern, Switzerland

<sup>5</sup> Service of Geriatric Medicine and Geriatric Rehabilitation, Lausanne University Hospital, Lausanne, Switzerland

<sup>6</sup> University Department of Geriatric Medicine FELIX PLATTER, and University of Basel, Basel, Switzerland

<sup>7</sup> Department of Geriatrics, Inselspital, University Hospital Bern, and University of Bern, Bern, Switzerland

<sup>8</sup> Department of Rehabilitation and Geriatrics, University Hospitals Geneva, Geneva, Switzerland

<sup>9</sup> City Hospital Waid and Triemli, Zurich, Switzerland

### Corresponding Author

Michael Gagesch, MD

Dept. of Geriatrics

University Hospital Zurich

Zurich, Switzerland

Email: michael.gagesch@usz.ch

### Metrics

Title Characters: 121 (16 words), Abstract word count: 274

Manuscript word count: 2,635 (full text), 35 references, 2 tables

Key Words (6): Frailty, frail elderly, older adults, frailty assessment, frailty index, electronic health records

Running Head: Swiss Frailty Network and Repository – Rationale and Design

**Abstract**

*Introduction:* Early identification of frailty by clinical instruments or accumulation of deficit indexes can contribute to improve health care for older adults, including the prevention of negative outcomes in acute care. However, conflicting evidence exists on how to best capture frailty in this setting. Simultaneously, the increasing utilization of electronic health records (EHR) opens up new possibilities for research and patient care, including frailty.

*Methods and analysis:* The Swiss Frailty Network and Repository (SFNR) primarily aims to develop an electronic Frailty Index (eFI) from routinely available EHR data in order to investigate its predictive value against length of stay and in-hospital mortality as two important clinical outcomes in a study sample of 1,000-1,500 hospital patients age 65 and older. In addition, we will examine the correlation between the eFI and a test-based clinical Frailty Instrument (cFI) to compare both concepts in Swiss older adults in acute care settings. As a Swiss Personalized Health Network (SPHN) driver project, our study will report on the characteristics and usability of the first nationwide eFI in Switzerland connecting all five Swiss University Hospitals' Geriatric Departments with a representative sample of patients aged 65 years and older admitted to acute care.

*Ethics and dissemination:* The study protocol was approved by the competent ethics committee of the Canton of Zurich (BASEC-ID 2019-00445). All acquired data will be handled according to SPHN's ethical framework for responsible data processing in personalized health research. Analyses will be performed within the secure BioMedIT environment, a national infrastructure to enable secure biomedical data processing, an integral part of SPHN. The SFNR is registered with ClinicalTrials.gov (NCT04516642), date of registration 18 August 2020 (retrospectively registered).



## Article Summary

### *Strengths and limitations of this study*

- This large multicenter study, recruiting 1,000-1,500 individuals will establish a new harmonized electronic Frailty Index (eFI) from routinely collected electronic patient data at all five Swiss academic geriatric centers
- The new electronic Frailty Index (eFI) has the potential to predict two very important adverse outcomes in acute care, length of stay and in-hospital mortality
- Furthermore, these new data will be used to investigate the correlation between the electronic Frailty Index (eFI) and a standardized clinical Frailty Instrument (cFI)
- Our study is not intended to establish long-term outcomes in participants identified as frail vs. their robust counterparts
- No report on potential interventions for participants identified as frail or at-risk of becoming frail is included at this stage of the project, however we aim to lay groundwork for a future implementation of frailty screening in clinical care

## Introduction

With the ongoing demographic transformation, aging societies convey an important challenge to present health care systems due to the growing number of older adults living with accumulating deficits, multimorbidity and frailty.<sup>1</sup> At the same time, health care informatics with its expanding amount of routinely collected, electronic patient data comprises a huge potential for the exploitation of data for research purposes and future developments in personalized medicine. In order to avoid age discrimination, this should also include the utilization of electronic patient data in the interest of older adults.

Over the last two decades, frailty was characterized as an age associated disproportionate decline in physiologic reserves leading to increased vulnerability to external stressors,<sup>2</sup> and shown to be an important predictor of negative health outcomes in older adults.<sup>3</sup> Nonetheless, frailty is still underdiagnosed in acute care although frail older adults have more frequent and longer hospital stays, are re-hospitalized more often and eventually die earlier than their non-frail counterparts.<sup>3,4</sup>

The British Geriatric Society issued a recommendation for routine frailty screening in geriatric outpatients in order to timely assess the risk of frailty on the health of older adults.<sup>5</sup> Moreover, frailty is becoming more and more recognized as a useful concept for risk stratification in various medical specialties, from oncology to heart surgery.<sup>6</sup> However, as the field is evolving, there has been no agreement either on the ideal conceptualization of frailty or on a single best screening instrument over the past decades.<sup>7-10</sup> This happened to be a major roadblock for the broader implementation of the frailty concept into patient care.<sup>11</sup> At the same time, assessing frailty systematically in clinical care might open up a window of opportunity for both improving patient care for older adults and accelerating research efforts for a better understanding of the underlying pathophysiology of frailty as a state or condition (i.e. by a Frailty Index approach) and as a syndrome (i.e. the frailty phenotype).<sup>10</sup>

Today, among the highly cited frailty conceptualizations, the frailty phenotype by Fried et al.<sup>12</sup> and the deficit accumulation concept (i.e. Frailty Index) by Rockwood and Mitnitski et al.<sup>13</sup> stand out as the two most extensively investigated approaches of frailty.<sup>14</sup> As this two approaches measure different concepts of frailty (i.e. a clinical syndrome vs. a multi-system decline based index) their comparability may be limited. In addition, it should be taken into account that the phenotype usually requires clinical measurements, whereas a Frailty Index (FI) can be generated from available patient data collected during routine clinical practice. Therefore, deriving a FI from electronic health records (EHR) data that are routinely collected, has the potential to expedite the routine identification of frail

1  
2  
3 patients in acute hospital care in various medical specialties, as no additional resources are needed.<sup>15</sup>  
4  
5 This approach has been recently demonstrated by Cesari et al. investigating a FI in an Italian cohort of  
6  
7 hospitalized patients.<sup>16</sup> With regard to the investigation of significant clinical endpoints including in-  
8  
9 hospital mortality and length of stay by an electronic Frailty Index (eFI), which has not been  
10  
11 undertaken in hospitalized older adults in Switzerland so far, a comparative view on both frailty  
12  
13 concepts contains the opportunity to provide important additional information.

14  
15 The Swiss Frailty Network and Repository (SFNR) aims to establish a nationwide harmonized  
16  
17 eFI consisting of 55 variables from routinely collected EHR data in patients age 65 and older at all five  
18  
19 Swiss University Hospitals in order to investigate its predictive abilities in regard to length of stay and  
20  
21 in-hospital mortality. A secondary validation aim investigates the correlation of the eFI as a screening  
22  
23 tool against the detection of frailty by a harmonized clinical Frailty Instrument (cFI) based on the Fried  
24  
25 phenotype concept, in a subset of patients age 65 and older from acute geriatric care at all five Swiss  
26  
27 University Hospitals' Geriatric Centers. In order to take into account the importance of cognitive  
28  
29 impairment with regard to frailty, we have added a short cognitive test as an additional component to  
30  
31 the cFI.<sup>17,18</sup> We will investigate the predictive abilities of both, the eFI and the cFI regarding two  
32  
33 important outcomes in acute hospital care, length of stay and in-hospital mortality. The development of  
34  
35 a frailty data repository will in addition serve as a basic personalized health research infrastructure for  
36  
37 future studies in older adults across all partner institutions.

38  
39 The utilization of routinely collected, electronic patient data is a major focus area in health  
40  
41 care, and of growing interest in many acute care settings, including geriatric medicine. Frailty is highly  
42  
43 prevalent in older patients and appears as a major driver of multiple negative outcomes in this  
44  
45 population. Establishing a harmonized eFI from routinely collected EHR data is therefore a timely effort  
46  
47 that will likely contribute to the improvement of care for older adult patients by early identifying those at  
48  
49 increased risk for adverse outcomes.

50  
51 The main deliverable of the SFNR will be to establish a nationwide eFI derived from routinely  
52  
53 collected electronic patient data for older adults in Switzerland curated within the SPHNs BioMedIT  
54  
55 ecosystem. We aim to demonstrate the eFI's predictive ability for length of stay and in-hospital  
56  
57 mortality and investigate the comparative performance of the eFI in the detection of frailty against our  
58  
59 clinical Frailty-Instrument (cFI) in a subset of patients admitted to acute geriatric care.

60  
Our proposition of a systematic clinical evaluation of frailty using the cFI as a clinical research  
reference standard in all enrolled patients admitted to acute geriatric care at all five Swiss Academic

1  
2  
3 Geriatric Centers is a secondary outcome of our collaboration that may lead to a more unified  
4 approach to the measurement of the frailty phenotype on the national level. Therefore, establishing the  
5 SFNR will likely advance both, the field of geriatric medicine and research in Switzerland.  
6  
7 Incorporating frailty as a criterion in acute care will allow a systematic and personalized pre-  
8 therapeutic stratification of patients according to each patient's profile. This individualized approach  
9 will enhance the definition of person-based potential harms and benefits of interventions in various  
10 medical disciplines, ranging from emergency medicine and orthogeriatric units to cardio-vascular  
11 surgery and comprehensive cancer care. We expect first results to be ready for scientific publication  
12 by mid 2022.  
13  
14  
15  
16  
17  
18  
19  
20  
21  
22  
23  
24  
25  
26  
27  
28  
29  
30  
31  
32  
33  
34  
35  
36  
37  
38  
39  
40  
41  
42  
43  
44  
45  
46  
47  
48  
49  
50  
51  
52  
53  
54  
55  
56  
57  
58  
59  
60

## Methods and analysis

The SFRN is a joint effort by all five Swiss Academic Geriatric Departments (Universities of Basel, Bern, Geneva, Lausanne and Zurich and adjacent University Hospitals) that is funded by the Swiss Personalized Health Network (SPHN, Grant No. 2017DRI02), an initiative of the Swiss Federal Government, namely the State Secretariat for Education, Research and Innovation and the Federal Office of Public Health.<sup>19</sup>

The SFNR has five primary aims:

- I. Reaching a consensus on a nationwide research reference standard to assess frailty clinically in geriatric patients at all five partner sites (definition of cFI, goal 1), see **Table 1**
- II. Reaching a consensus on the candidate variables aggregating to a harmonized eFI from regularly collected electronic patient data extracted from the local clinical information systems (CIS) at all five sites (goal 2), **Table 2**
- III. Setting up of a frailty data hub for the collection, organization and maintenance of coded data from all five centers including both, the cFI from patients in acute care seen by the geriatric teams at each site (related to goal 1) and the harmonized eFI (related to goal 2) from all patients age 65 and older at the partnering Swiss University Hospitals
- IV. Investigating the correlation of the eFI as a screening tool against the cFI as a clinical criterion standard within the pooled data set from all five Geriatric Centers (association study)
- V. Investigating whether the prognostic abilities differ between the cFI and the eFI with regard to the prediction of length of stay (LOS) and in-hospital mortality in acute geriatric care (correlation study)

### *Sample size calculation*

For our study, the estimated total sample size of 1,000 to 1,500 patients within a 12-month planned period was based on the two primary endpoints, hospital LOS and in-hospital mortality. In a prior study, Hope et al. found a median (IQR) LOS in the hospital for non-frail and frail individuals to be 13 (IQR 8-23) days and 17 (IQR 10-30) days, respectively.<sup>20</sup> Assuming symmetry, this translates to a mean (SD) of 13 (SD=(23-8)/1.35=11.1) days for non-frail individuals and 17 (14.8) days for frail

1  
2  
3 individuals.<sup>21</sup> Another study investigating older adult medical inpatients found a range in LOS between  
4 4.2 and 7.8 along a Frailty Index score based on a comprehensive geriatric assessment.<sup>22</sup> In addition,  
5 a systematic review and meta-analysis of nine observational studies investigating outcomes in general  
6 surgery reported a mean LOS of 9.6 days (95% CI: 6.2–12.9) in frail, and 6.4 days (4.9–7.9) in non-  
7 frail patients.<sup>23</sup> Conservatively assuming 20% of older adults in acute care are frail (expected range  
8 from literature 20-50%)<sup>24</sup> and assuming a difference in hospital LOS of 4 days, a total of 418 persons  
9 (92 frail, 326 non-frail) would be needed to achieve 80% power at the 0.05 alpha level. Using a more  
10 conservative estimate of detecting a difference in hospital LOS of 2 days, 1,655 (364 frail, 1,291 non-  
11 frail) individuals would be needed to achieve 80% power at the 0.05 alpha level. Vermeiren et al.  
12 conducted a meta-analysis of 24 prospective studies comprising over 150,000 individuals and found  
13 frailty to increase the likelihood of mortality more than 2-fold (OR 2.34 [1.77-3.09]).<sup>3</sup> We assume 20%  
14 of individuals are frail, and leave room for a greater degree of uncertainty (wider confidence interval,  
15 CI 1.42-3.91) since this is a single study as opposed to a large meta-analysis comprising many  
16 individuals. For a mortality rate of 5% in non-frail individuals, a total of 1,077 persons (237 frail, 840  
17 non-frail) would be required to detect an OR=2.34 at the 0.05 confidence level.

18  
19  
20  
21  
22  
23  
24  
25  
26  
27  
28  
29  
30  
31  
32 In summary, we consider a sample size of approximately 200-300 patients enrolled at each of  
33 the five partnering sites over the planned 12-month period sufficient to answer our research questions.  
34 However, the number of recruited participants at each site might not be equally distributed and differ  
35 largely due to the local environments and in-patient capacities. Of note, the primary analysis will be  
36 performed on the total sample of 1000 to 1500 patients.

#### 37 38 39 40 41 *Data Collection*

42  
43 The data collection for the components of the cFI will take place within the first four days upon  
44 admission to acute geriatric care at all partner sites by certified examiners following a standardized  
45 protocol. For calculating the eFI, only variables available from within 4 days upon admission will be  
46 retrieved from the EHR and included to the dataset.

#### 47 48 49 50 51 *Statistical Analysis*

52  
53 In regard to the eFI's variables, each will be scored as either "1", i.e. presence of the deficit or  
54 "0", i.e. absence of the deficit, except for Body Mass Index (BMI, <18.5 or ≥30 = 1, >25 and <30 = 0.5,  
55 other = 0), see table 2 for full list of variables. We will use validated cut-points regarding the  
56 classification of the degree of robustness or frailty from prior literature.<sup>25,26</sup> We will additionally test,  
57 whether eFI scores differ between the classification of frail/pre-frail and robust by the cFI in our sub-  
58  
59  
60

1  
2  
3 sample from acute geriatric care. To evaluate the ability of the eFI screening tool to correctly classify  
4 each patient as frail, pre-frail or non-frail in regard to the phenotypic approach, we will calculate the  
5 sensitivity, specificity, as well as positive and negative predictive values of the eFI (pre-defined cut-offs  
6 and tertiles) against the cFI.<sup>27</sup> Each potential threshold will be applied to the continuous total sum  
7 scores of the eFI to classify frail vs. non-frail participants. The resulting true positive rate (sensitivity)  
8 and false positive rate (1 – specificity) will be determined using the cFI as the reference. A receiver  
9 operating characteristic (ROC) curve will be constructed of all possible thresholds of the eFI.  
10 Discriminative ability will be estimated based on the area under the ROC curve and associated C  
11 statistics.  
12  
13  
14  
15  
16  
17  
18  
19

20 Hospital LOS in frail and non-frail individuals (classified by eFI and cFI) will be summarized  
21 using mean, median, standard deviation, interquartile range, minimum and maximum. Differences in  
22 hospital LOS between frail and non-frail individuals will be tested using a two-sided independent *t* test,  
23 or Mann-Whitney *U* test if the data is skewed, at the 0.05 level. In-hospital mortality rates will be  
24 calculated for the overall sample as well as for frail and non-frail subgroups. Logistic regression will be  
25 used to quantify the association of frail (vs. non-frail) on in-hospital mortality.  
26  
27  
28  
29  
30

### 31 *Progress to Date*

32  
33 In the first year of the project, consensus was reached among the project partners regarding  
34 the composition and scoring of the clinical frailty instrument (cFI). At the same time, the 55 variables  
35 summarized in the electronic Frailty Index (eFI) were defined and harmonized. In the second year, the  
36 local requirements for the provision of the data to be collected were analyzed and the required IT  
37 infrastructure for secure data processing and delivery was set up. At the same time, the project-related  
38 data infrastructure within the BioMedIT network was defined and made available by SPHN. Enrolment  
39 of first participants into the study began in June 2020.  
40  
41  
42  
43  
44  
45  
46

### 47 *Patient and public involvement*

48  
49 Patients and the general public were not involved in the design, recruitment and  
50 implementation of our study. Participants will be informed regarding the detailed results of our study  
51 only upon request. However, the results will be disseminated to the public according to the SPHN's  
52 dissemination policy and by published articles.  
53  
54  
55  
56  
57  
58  
59  
60

## Ethics and dissemination

For the association study, with regard to the eFI, we will use data from consecutive patients age 65 and older admitted to acute care on various departments of the partnering university hospitals from a determined starting date and with available written informed consent for further use of routine clinical data. For the correlation study, we will use data from all patients 65 years and older recruited from acute geriatric care units who agreed to participate in the study by informed consent.

All ethics committees of the involved partner sites, chaired by the ethics committee of the Canton of Zurich have approved our study (swissethics BASEC-ID 2019-00445).

### *Swiss Personalized Health Network IT Ecosystem*

Our project's hosting initiative, the SPHN, is currently developing a nationwide health care data ecosystem in Switzerland to work towards interoperability of data from local information systems, e.g. clinical data management systems in enabling an effective exchange of patient data (e.g. disease phenotypes) for research with the ultimate goal of advancing personalized medicine.<sup>28,29</sup> Our project will support and build on this effort as a driver project. In a first step, the agreed set of eFI variables was submitted to the SPHN Clinical Semantic Interoperability Working Group, which has integrated the variables in a Swiss wide core dataset and is defining for each variable in which format they shall be shared and which additional (meta-) data are needed for optimal interoperability. The data of the test-based clinical Frailty Instrument will be collected in a standardized and centralized electronic Case Report Form in REDCap (Vanderbilt University, Nashville, USA) or in the clinical information system (EHR).

Next, our collected data (eFI and cFI) will be locally pre-processed by the clinical data warehouse teams. In particular, patient IDs will be mapped and de-identified before sharing to respect data privacy regulations.<sup>28</sup> Additionally, a standardized format for data transfer defined by a Data Coordination Center (DCC) will be used in order to allow interoperability. We will utilize the novel Swiss BioMedIT-Node secure data infrastructure currently under development by the Swiss Institute of Bioinformatics (SIB) and managed by the Personalized Health Informatics (PHI) Group and coordinated by the DCC as part of SPHN.<sup>30</sup> The de-identified data will be encrypted with a secure, standard mechanism (GPG) and sent via secure transfer to BioMedIT.

On BioMedIT, the analysis of the data will take place using state of the art software and tools thereby ensuring highest security levels for access to data, processing and sharing. FAIR data



principles (findability, accessibility, interoperability, reusability) will be respected and ensured throughout the project in accordance with SPHN strategy.

## Tables and Figures

**Table 1.** Components of the SFNR clinical Frailty Instrument (cFI)

| Domain (item)           | Operationalization (test-based)                                                                                                                           | Cut-Point (threshold)                                                                                                                                                                 |
|-------------------------|-----------------------------------------------------------------------------------------------------------------------------------------------------------|---------------------------------------------------------------------------------------------------------------------------------------------------------------------------------------|
| Shrinking (Weight Loss) | <b>Unintentional weight loss</b> or loss of appetite; report of lose clothing, weight loss documented in patient chart                                    | Any reported weight loss or loss of appetite or lose clothing, or >5% last 6 months (from EHR)                                                                                        |
| Fatigue                 | <b>Self-reported exhaustion</b> measured by Geriatric Depression Scale 4-item                                                                             | ≥2 Points on GDS-4 <sup>31,32</sup>                                                                                                                                                   |
| Slowness                | <b>Slow gait speed</b> on standardized 4m measurement from a standing start (best of 2 consecutive measurements)                                          | Gait speed below 0.8m/s                                                                                                                                                               |
| Weakness                | <b>Low hand grip strength</b> measured by the Martin Vigorimeter (in Kilopascal), best of 3 consecutive trials at the dominant hand at time of assessment | Below the median of lowest 20% (by gender and age <75 and ≥75 years of age) compared to a sample of generally healthy Swiss older adults (from the DO-HEALTH study <sup>33,34</sup> ) |
| Low Activity Level      | <b>Reported frequency of activities with moderate energy expenditure</b> (question BR016_ModSprtsAct from SHARE questionnaire <sup>35</sup> )             | Answer of "less than once a week"                                                                                                                                                     |
| Cognition               | <b>Three item recall, and clock drawing test (CDT)</b>                                                                                                    | Any error in recall or CDT indicates cognitive disturbance                                                                                                                            |

**Table 2.** Variables and Coding of the SFNR electronic Frailty Index (eFI)

| <b>System</b>                 | <b>Source</b>                     | <b>Variables (No.)</b>                                                                                                                                                                                                                                                                            | <b>Cut-point/Coding</b>                                                                                        |
|-------------------------------|-----------------------------------|---------------------------------------------------------------------------------------------------------------------------------------------------------------------------------------------------------------------------------------------------------------------------------------------------|----------------------------------------------------------------------------------------------------------------|
| <i>Functional Impairments</i> | Electronic Health Records:        | 1. Chronic constipation<br>2. Feeling tired<br>3. Problems with falling/staying asleep<br>4. Problems with sleep-awake cycle<br>5. Urinary incontinence<br>6. Help getting on/off bed<br>7. Help going to the toilet<br>8. Help walking<br>9. History of falls                                    | yes=1, no=0                                                                                                    |
|                               | Electronic Nursing Charts (NANDA) | 10. Inability to walk stairs<br>11. Irregular gait pattern<br>12. Patient using walking equipment/aid<br>13. Problems getting dressed<br>14. Problems with bathing<br>15. Clouding or delirium                                                                                                    |                                                                                                                |
|                               |                                   | 16. Food intake                                                                                                                                                                                                                                                                                   | impaired=1, normal=0                                                                                           |
| <i>Comorbidities</i>          | Electronic Health Records:        | 17. Active malignancy<br>18. Hearing impairment<br>19. History of osteoporosis<br>20. Cardiac arrhythmias<br>21. Coronary heart disease<br>22. Pressure sores (decubital ulcers)<br>23. Diabetes mellitus                                                                                         | Presence (yes)=1, absence (no)=0                                                                               |
|                               | Diagnosis List<br>Medication Use  | 24. History of seizures<br>25. History of stroke<br>26. Memory impairment<br>27. Chronic obstructive lung disease (COPD)<br>28. Use of anticoagulation medication<br>29. Use of antiplatelet medication<br>30. Polypharmacy (>5 drugs)<br>31. Use of sedative, hypnotic, and/or neuroleptic drugs |                                                                                                                |
| <i>Laboratory Results</i>     | Primary Laboratory System         | 32. Haematocrit                                                                                                                                                                                                                                                                                   | <35%=1, ≥35%=0                                                                                                 |
|                               |                                   | 33. Haemoglobin<br>34. Platelet Count<br>35. Red cell volume (MCV)<br>36. Creatinine<br>37. Urea<br>38. Thyrotropin (TSH)<br>39. C-reactive protein (CRP)<br>40. Lymphocyte total count<br>41. HDL (High-density lipoprotein)<br>42. Potassium<br>43. Sodium<br>44. Albumin                       | Serum concentration above or below reference range=1, within=0                                                 |
|                               |                                   | 45. Blood glucose                                                                                                                                                                                                                                                                                 | <3.9 or >15 mmol/l=1, other=0                                                                                  |
|                               |                                   | 46. Cholesterol                                                                                                                                                                                                                                                                                   | >7 or <3.5 mmol/L=1, other=0                                                                                   |
| <i>Vital Signs</i>            | Electronic Health Records         | 47. Body Temperature                                                                                                                                                                                                                                                                              | <36,3°C=1, ≥36,3°C=0                                                                                           |
|                               |                                   | 48. Diastolic blood pressure<br>49. Heart rate (pulse)<br>50. Systolic blood pressure<br>51. Oxygen saturation (spO2)<br>52. Patient requires supplemental oxygen                                                                                                                                 | >90mmHg=1, ≤90 mmHg=0<br><60 or >99 BPM=1, other=0<br>>140mmHg=1, ≤140 mmHg=0<br><90%=1, ≥90%=0<br>yes=1, no=0 |
| <i>Other</i>                  | Electronic Health Records         | 53. Age                                                                                                                                                                                                                                                                                           | >80=1, ≤80=0                                                                                                   |
|                               |                                   | 54. BMI (Body Mass Index)<br>55. Patient reports being in pain                                                                                                                                                                                                                                    | <18.5 or ≥30=1; >25 and <30=0.5, other=0<br>yes=1, no=0                                                        |

### List of Abbreviations

|       |   |                                                      |
|-------|---|------------------------------------------------------|
| AUC   | - | Area under the curve                                 |
| BASEC | - | Business Administration System for Ethics Committees |
| cFI   | - | clinical Frailty Instrument                          |
| CI    | - | Confidence Interval                                  |
| eFI   | - | electronic Frailty Index                             |
| DCC   | - | Data Coordination Center                             |
| EHR   | - | Electronic Health Records                            |
| GPG   | - | Gnu Privacy Guard                                    |
| ID    | - | Identifier                                           |
| IQR   | - | Inter quartile range                                 |
| LOS   | - | Length of stay                                       |
| OR    | - | Odds ratio                                           |
| PHI   | - | Personalized Health Informatics                      |
| ROC   | - | Receiver Operating Characteristics                   |
| SFNR  | - | Swiss Frailty Network & Repository                   |
| SIB   | - | Swiss Institute of Bioinformatics                    |
| SPHN  | - | Swiss Personalized Health Network                    |

### Declarations

- *Ethics approval and consent to participate*

The competent ethic committees of the involved partner sites, chaired by the Ethics Committee of the Canton of Zurich, Switzerland have approved our study (swissethics BASEC-ID 2019-00445, DOA September 23, 2019). Participants are enrolled to the study after written informed consent.

- *Competing interests*

The authors declare that they have no competing interests.

- *Funding*

This project has been funded as a driver project by the Swiss Personalized Health Network (grant number 2017DRI02) with the participating University Hospitals in-kind contributions of

the same amount (matching funds, grant number N/A). The funding source was not involved in study design, and will not be involved in the collection, analysis or interpretation of data.

- Authors' contributions

MG and KE prepared the first draft of the manuscript. PO CB and LAA provided the power analysis and wrote the section on statistical analysis. LSB, TM, DB, DZ, CJB, GG, RWK, AES have read and edited the paper for intellectual content and contributed significantly to the manuscript. HABF was a major contributor in writing the final manuscript. MG prepared the final editing before submission. All authors read and approved the final manuscript.

- Acknowledgements

Not applicable.

## References

1. Newman AB. Comorbidity and Multimorbidity. In: Newman A, Cauley, J., ed. *The Epidemiology of Aging*. Dordrecht: Springer; 2012.
2. Clegg A, Young J, Iliffe S, Rikkert MO, Rockwood K. Frailty in elderly people. *Lancet*. 2013;381(9868):752-762.
3. Vermeiren S, Vella-Azzopardi R, Beckwee D, et al. Frailty and the Prediction of Negative Health Outcomes: A Meta-Analysis. *J Am Med Dir Assoc*. 2016;17(12):1163.e1161-1163.e1117.
4. Lin HS, Watts JN, Peel NM, Hubbard RE. Frailty and post-operative outcomes in older surgical patients: a systematic review. *BMC geriatrics*. 2016;16(1):157.
5. Turner G, Clegg A. Best practice guidelines for the management of frailty: a British Geriatrics Society, Age UK and Royal College of General Practitioners report. *Age and Ageing*. 2014;43(6):744-747.
6. Theou O, Squires E, Mallery K, et al. What do we know about frailty in the acute care setting? A scoping review. *BMC geriatrics*. 2018;18(1):139.
7. Morley JE, Vellas B, van Kan GA, et al. Frailty consensus: a call to action. *J Am Med Dir Assoc*. 2013;14(6):392-397.
8. Rodriguez-Manas L, Fear C, Mann G, et al. Searching for an operational definition of frailty: a Delphi method based consensus statement: the frailty operative definition-consensus conference project. *J Gerontol A Biol Sci Med Sci*. 2013;68(1):62-67.
9. Dent E, Kowal P, Hoogendijk EO. Frailty measurement in research and clinical practice: A review. *Eur J Intern Med*. 2016;31:3-10.
10. Dent E, Martin FC, Bergman H, Woo J, Romero-Ortuno R, Walston JD. Management of frailty: opportunities, challenges, and future directions. *The Lancet*. 2019;394(10206):1376-1386.
11. Walston J, Bandeen-Roche K, Buta B, et al. Moving Frailty Toward Clinical Practice: NIA Intramural Frailty Science Symposium Summary. *J Am Geriatr Soc*. 2019.
12. Fried LP, Tangen CM, Walston J, et al. Frailty in older adults: evidence for a phenotype. *J Gerontol A Biol Sci Med Sci*. 2001;56(3):M146-156.
13. Mitnitski AB, Mogilner AJ, Rockwood K. Accumulation of deficits as a proxy measure of aging. *TheScientificWorldJournal*. 2001;1:323-336.
14. Buta BJ, Walston JD, Godino JG, et al. Frailty assessment instruments: Systematic characterization of the uses and contexts of highly-cited instruments. *Ageing Res Rev*. 2016;26:53-61.

- 1
- 2
- 3 15. Clegg A, Bates C, Young J, et al. Development and validation of an electronic frailty index
- 4 using routine primary care electronic health record data. *Age Ageing*. 2016;45(3):353-360.
- 5 16. Cesari M, Franchi C, Cortesi L, Nobili A, Ardoino I, Mannucci PM. Implementation of the
- 6 Frailty Index in hospitalized older patients: Results from the REPOSI register. *Eur J Intern*
- 7 *Med*. 2018.
- 8 17. Avila-Funes JA, Amieva H, Barberger-Gateau P, et al. Cognitive impairment improves the
- 9 predictive validity of the phenotype of frailty for adverse health outcomes: the three-city study.
- 10 *J Am Geriatr Soc*. 2009;57(3):453-461.
- 11 18. Boyle PA, Buchman AS, Wilson RS, Leurgans SE, Bennett DA. Physical frailty is associated
- 12 with incident mild cognitive impairment in community-based older persons. *J Am Geriatr Soc*.
- 13 2010;58(2):248-255.
- 14 19. Bischoff Ferrari HA, Stuck AE, Kressig RW, Gold G, Bula C. Swiss Frailty Network and
- 15 Repository -SFNR. In: Switzerland: Swiss Personalized Health Network; 2017.
- 16 20. Hope AA, Adeoye O, Chuang EH, Hsieh SJ, Gershengorn HB, Gong MN. Pre-hospital frailty
- 17 and hospital outcomes in adults with acute respiratory failure requiring mechanical ventilation.
- 18 *Journal of critical care*. 2018;44:212-216.
- 19 21. Wan X, Wang W, Liu J, Tong T. Estimating the sample mean and standard deviation from the
- 20 sample size, median, range and/or interquartile range. *BMC Med Res Methodol*. 2014;14:135.
- 21 22. Evans SJ, Sayers M, Mitnitski A, Rockwood K. The risk of adverse outcomes in hospitalized
- 22 older patients in relation to a frailty index based on a comprehensive geriatric assessment.
- 23 *Age Ageing*. 2014;43(1):127-132.
- 24 23. Hewitt J, Long S, Carter B, Bach S, McCarthy K, Clegg A. The prevalence of frailty and its
- 25 association with clinical outcomes in general surgery: a systematic review and meta-analysis.
- 26 *Age Ageing*. 2018;47(6):793-800.
- 27 24. Hogan DB, Maxwell CJ, Afilalo J, et al. A Scoping Review of Frailty and Acute Care in Middle-
- 28 Aged and Older Individuals with Recommendations for Future Research. *Canadian geriatrics*
- 29 *journal : CGJ*. 2017;20(1):22-37.
- 30 25. Song X, Mitnitski A, Rockwood K. Prevalence and 10-year outcomes of frailty in older adults in
- 31 relation to deficit accumulation. *J Am Geriatr Soc*. 2010;58(4):681-687.
- 32 26. Rockwood K, Song X, Mitnitski A. Changes in relative fitness and frailty across the adult
- 33 lifespan: evidence from the Canadian National Population Health Survey. *Cmaj*.
- 34 2011;183(8):E487-494.
- 35 27. Rockwood K, Andrew M, Mitnitski A. A comparison of two approaches to measuring frailty in
- 36 elderly people. *J Gerontol A Biol Sci Med Sci*. 2007;62(7):738-743.
- 37 28. Swiss Personalized Health Network. *Swiss Personalized Health Network (SPHN)*. 2017;
- 38 <https://www.sphn.ch/en/about.html>. Accessed 25.07.2019, 2019.
- 39 29. Meier-Abt PJ, Lawrence AK, Selter L, Vayena E, Schwede T. The Swiss approach to precision
- 40 medicine. *Swiss medical weekly*. 2018.
- 41 30. Swiss Institute of Bioinformatics. Personalized Health Informatics Group. 2018;
- 42 [https://www.sib.swiss/research-infrastructure/personalized-health-2/personalized-health-](https://www.sib.swiss/research-infrastructure/personalized-health-2/personalized-health-informatics-group)
- 43 [informatics-group](https://www.sib.swiss/research-infrastructure/personalized-health-2/personalized-health-informatics-group). Accessed 25.07.2019, 2019.
- 44 31. D'Ath P, Katona P, Mullan E, Evans S, Katona C. Screening, detection and management of
- 45 depression in elderly primary care attenders. I: The acceptability and performance of the 15
- 46 item Geriatric Depression Scale (GDS15) and the development of short versions. *Family*
- 47 *practice*. 1994;11(3):260-266.
- 48 32. Shah A, Herbert R, Lewis S, Mahendran R, Platt J, Bhattacharyya B. Screening for depression
- 49 among acutely ill geriatric inpatients with a short Geriatric Depression Scale. *Age Ageing*.
- 50 1997;26(3):217-221.
- 51 33. Bischoff-Ferrari HA, Molino CdGRC, Rival S, et al. DO-HEALTH: Vitamin D3 - Omega3 -
- 52 Home exercise - Healthy aging and longevity trial - Design of a multinational clinical trial on
- 53 healthy aging among European seniors. *Contemporary clinical trials*. 2020:106124.
- 54 34. Bischoff-Ferrari HA, Vellas B, Rizzoli R, et al. Effect of Vitamin D Supplementation, Omega-3
- 55 Fatty Acid Supplementation, or a Strength-Training Exercise Program on Clinical Outcomes in
- 56 Older Adults: The DO-HEALTH Randomized Clinical Trial. *JAMA*. 2020;324(18):1855-1868.
- 57 35. Börsch-Supan A., Brügiavini A. *Health, Ageing and Retirement in Europe - First Results from*
- 58 *the Survey of Health, Ageing and Retirement in Europe*. Mannheim Research Institute for the
- 59 Economics of Aging (MEA); 2008.
- 60
